# Supplementary material for: Treatment with the Olive Secoiridoid Oleacein Protects against the Intestinal Alterations Associated with EAE
Source: MDPI journal article supplement (doi:10.3390/ijms24054977), 2023-03-04
Supplement: s1 [file s1]

Figure S1

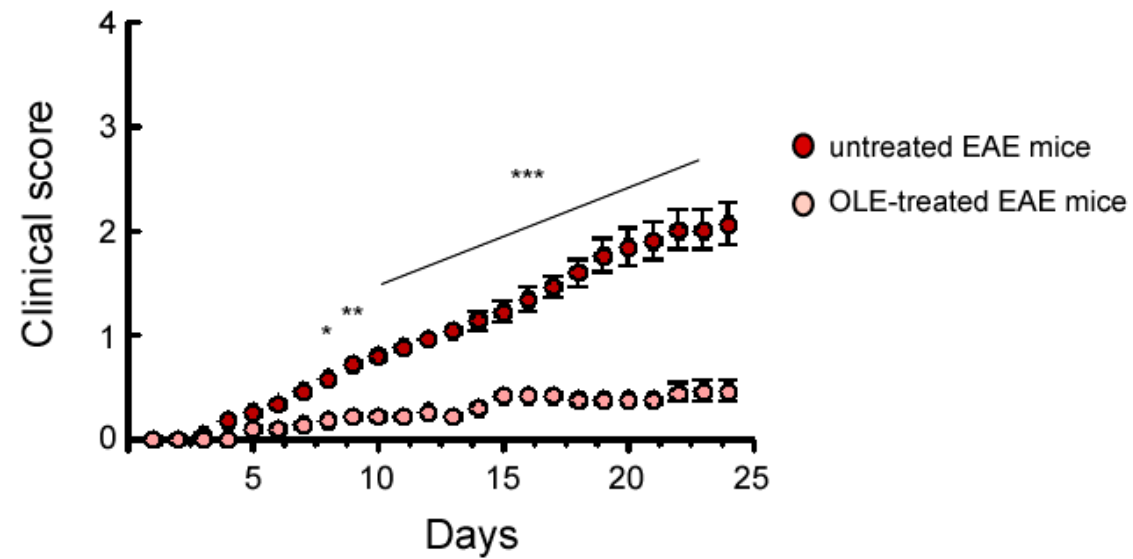

**Figure S1. Effect of OLE treatment on clinical parameters in EAE mice.**  
Effect on the evolution of clinical signs in untreated EAE mice and OLE-treated EAE mice (n= 10, in all groups). \*p<0.05, \*\*p<0.01 and \*\*\*p<0.001 vs OLE+EAE
